# Supplementary material
Source: publisher site journal article supplement (https://www.spandidos-publications.com/7580/downloadSupplementary)
Supplement: Supplementary file 1 [file downloadSupplementary]

## Sheet: Table SXII
Table SXII. Results of GSVA enrichment analysis.
id	logFC	AveExpr	t	P-value	adj.P.Val	B	threshold
EMBRYONIC_APPENDAGE_MORPHOGENESIS	-0.241918	-0.105768	-13.8463	8.47222e-36	8.8128e-32	70.5021	Down
LUNG_SACCULE_DEVELOPMENT	-0.456783	-0.060024	-12.7871	1.491e-31	3.87735e-28	60.8745	Down
REGULATION_OF_ANIMAL_ORGAN_MORPHOGENESIS	-0.209637	-0.11194	-12.6575	4.82761e-31	1.00434e-27	59.7176	Down
NEGATIVE_REGULATION_OF_VASCULAR_ASSOCIATED_SMOOTH_MUSCLE_CELL_DIFFERENTIATION	-0.583172	-0.041024	-12.5964	8.38894e-31	1.45436e-27	59.1735	Down
NEURAL_TUBE_PATTERNING	-0.368392	-0.0578371	-12.3187	1.01891e-29	1.32484e-26	56.7151	Down
APPENDAGE_MORPHOGENESIS	-0.227069	-0.0904801	-11.8878	4.67576e-28	3.47409e-25	52.9486	Down
NEURAL_PLATE_PATTERN_SPECIFICATION	-0.644565	-0.0364915	-11.781	1.19583e-27	7.33395e-25	52.0244	Down
SENSORY_ORGAN_MORPHOGENESIS	-0.150859	-0.113167	-11.7504	1.56315e-27	9.03325e-25	51.7607	Down
NEURAL_PLATE_REGIONALIZATION	-0.626666	-0.0290891	-11.7252	1.94849e-27	1.01594e-24	51.5439	Down
REGULATION_OF_ESTABLISHMENT_OF_PLANAR_POLARITY	-0.311981	-0.0764414	-11.7249	1.95336e-27	1.01594e-24	51.5414	Down
SOMATIC_STEM_CELL_DIVISION	-0.537415	-0.00795716	-11.6069	5.47585e-27	2.37332e-24	50.527	Down
ESTABLISHMENT_OF_TISSUE_POLARITY	-0.299325	-0.064821	-11.5174	1.19168e-26	4.76766e-24	49.7618	Down
NON_CANONICAL_WNT_SIGNALING_PATHWAY	-0.26012	-0.0649771	-11.4796	1.65491e-26	5.93599e-24	49.4387	Down
PATTERN_SPECIFICATION_PROCESS	-0.155989	-0.0744532	-11.4472	2.19081e-26	6.70258e-24	49.1627	Down
DORSAL_VENTRAL_NEURAL_TUBE_PATTERNING	-0.387952	-0.0790302	-11.3422	5.42025e-26	1.48372e-23	48.2714	Down
MORPHOGENESIS_OF_A_POLARIZED_EPITHELIUM	-0.286385	-0.0729685	-11.3216	6.47614e-26	1.64304e-23	48.0963	Down
SMOOTHENED_SIGNALING_PATHWAY_INVOLVED_IN_DORSAL_VENTRAL_NEURAL_TUBE_PATTERNING	-0.601976	-0.10963	-11.2666	1.0386e-25	2.34858e-23	47.6316	Down
EMBRYONIC_DIGIT_MORPHOGENESIS	-0.270156	-0.0426182	-11.1813	2.15707e-25	4.67454e-23	46.9126	Down
SPINAL_CORD_DEVELOPMENT	-0.211946	-0.067662	-11.1169	3.74009e-25	7.93968e-23	46.3712	Down
SPINAL_CORD_MOTOR_NEURON_DIFFERENTIATION	-0.287683	-0.0787065	-11.0964	4.45403e-25	8.90977e-23	46.1993	Down
CARDIAC_SEPTUM_MORPHOGENESIS	-0.273459	-0.0331587	-10.9959	1.04659e-24	1.90994e-22	45.359	Down
APPENDAGE_DEVELOPMENT	-0.206272	-0.0745676	-10.9797	1.2002e-24	2.1525e-22	45.2243	Down
NEGATIVE_REGULATION_OF_CIRCADIAN_RHYTHM	-0.498208	-0.034002	-10.9713	1.28871e-24	2.27207e-22	45.1543	Down
SALIVARY_GLAND_DEVELOPMENT	-0.266118	-0.184919	-10.9445	1.61772e-24	2.75861e-22	44.9307	Down
RETINAL_ROD_CELL_DIFFERENTIATION	-0.407504	-0.106812	-10.8584	3.34442e-24	5.35211e-22	44.2164	Down
LENS_DEVELOPMENT_IN_CAMERA_TYPE_EYE	-0.245101	-0.0467816	-10.8108	4.99495e-24	7.87235e-22	43.822	Down
ATRIOVENTRICULAR_VALVE_FORMATION	-0.504154	-0.090671	-10.7428	8.83668e-24	1.25917e-21	43.261	Down
AXONAL_FASCICULATION	-0.374217	-0.0641446	-10.7292	9.89862e-24	1.39142e-21	43.1494	Down
NEGATIVE_REGULATION_OF_MONOCYTE_DIFFERENTIATION	-0.50206	-0.141584	-10.6388	2.10609e-23	2.84514e-21	42.407	Down
EMBRYONIC_ORGAN_MORPHOGENESIS	-0.125672	-0.0792307	-10.6171	2.52351e-23	3.32272e-21	42.2292	Down
VENTRICULAR_SEPTUM_MORPHOGENESIS	-0.329751	-0.0375389	-10.596	3.00889e-23	3.91231e-21	42.0563	Down
REGULATION_OF_CHONDROCYTE_DEVELOPMENT	-0.488938	-0.20946	-10.5796	3.44727e-23	4.37299e-21	41.9226	Down
REGIONALIZATION	-0.147425	-0.0785494	-10.571	3.70422e-23	4.64232e-21	41.8519	Down
REGULATION_OF_ANION_CHANNEL_ACTIVITY	-0.491864	-0.0125104	-10.5595	4.07405e-23	5.04503e-21	41.7583	Down
ANTERIOR_POSTERIOR_PATTERN_SPECIFICATION	-0.158848	-0.0742195	-10.5173	5.78185e-23	7.07562e-21	41.4142	Down
VENTRAL_SPINAL_CORD_DEVELOPMENT	-0.205535	-0.0769249	-10.4993	6.7105e-23	7.86629e-21	41.2677	Down
LUNG_ALVEOLUS_DEVELOPMENT	-0.286587	-0.0332352	-10.499	6.7283e-23	7.86629e-21	41.2651	Down
SPECIFICATION_OF_SYMMETRY	-0.211253	-0.0718528	-10.4759	8.14247e-23	9.2063e-21	41.0776	Down
CORECEPTOR_ACTIVITY_INVOLVED_IN_WNT_SIGNALING_PATHWAY	-0.443268	-0.130661	-10.4418	1.07903e-22	1.20689e-20	40.8008	Down
DORSAL_VENTRAL_PATTERN_FORMATION	-0.177383	-0.0959854	-10.3906	1.64558e-22	1.78305e-20	40.386	Down
CHONDROCYTE_DIFFERENTIATION_INVOLVED_IN_ENDOCHONDRAL_BONE_MORPHOGENESIS	-0.399229	-0.0357657	-10.2627	4.69583e-22	4.78882e-20	39.3554	Down
CARDIAC_SEPTUM_DEVELOPMENT	-0.277754	-0.0526719	-10.2479	5.30119e-22	5.19437e-20	39.2363	Down
TONGUE_DEVELOPMENT	-0.341856	-0.0187114	-10.2469	5.34318e-22	5.19437e-20	39.2285	Down
CELL_DIFFERENTIATION_IN_HINDBRAIN	-0.324184	-0.0686965	-10.1651	1.04063e-21	9.75192e-20	38.5735	Down
NEGATIVE_REGULATION_OF_SMOOTH_MUSCLE_CELL_DIFFERENTIATION	-0.409905	-0.0559058	-10.1469	1.20592e-21	1.11999e-19	38.4286	Down
REGULATION_OF_SMOOTHENED_SIGNALING_PATHWAY_INVOLVED_IN_DORSAL_VENTRAL_NEURAL_TUBE_PATTERNING	-0.521459	-0.130136	-10.1002	1.76169e-21	1.57975e-19	38.0562	Down
PIRNA_BIOSYNTHETIC_PROCESS	-0.534207	-0.0468559	-10.0799	2.07644e-21	1.83043e-19	37.8947	Down
ORNITHINE_TRANSPORT	-0.489073	-0.0669214	-10.0744	2.17067e-21	1.89742e-19	37.8511	Down
SOMATIC_DIVERSIFICATION_OF_T_CELL_RECEPTOR_GENES	-0.731448	-0.0228759	-10.0493	2.65807e-21	2.26633e-19	37.6521	Down
REGULATION_OF_HISTONE_H3_K14_ACETYLATION	-0.588986	-0.031677	-10.0086	3.69024e-21	3.1208e-19	37.3298	Down
POST_ANAL_TAIL_MORPHOGENESIS	-0.280892	-0.0733174	-9.95867	5.5154e-21	4.58969e-19	36.935	Down
REGULATION_OF_NEURON_DIFFERENTIATION	-0.178277	-0.0483876	-9.85765	1.23867e-20	9.76112e-19	36.1403	Down
VESTIBULOCOCHLEAR_NERVE_MORPHOGENESIS	-0.632455	-0.0216483	-9.84815	1.33618e-20	1.03724e-18	36.0659	Down
TROPONIN_I_BINDING	-0.51165	-0.176289	-9.84234	1.39958e-20	1.07047e-18	36.0203	Down
DIACYLGLYCEROL_KINASE_ACTIVITY	-0.419289	-0.173198	-9.73098	3.39276e-20	2.38456e-18	35.1508	Down
REGULATION_OF_PHENOTYPIC_SWITCHING	-0.527085	0.0659682	-9.70743	4.08859e-20	2.81652e-18	34.9676	Down
EXTRACELLULAR_MATRIX_CELL_SIGNALING	-0.53338	-0.00235251	-9.69234	4.60662e-20	3.1319e-18	34.8504	Down
REGULATION_OF_VASCULAR_ASSOCIATED_SMOOTH_MUSCLE_CELL_DIFFERENTIATION	-0.269011	0.00783699	-9.69004	4.69132e-20	3.16877e-18	34.8325	Down
CELLULAR_RESPONSE_TO_MAGNESIUM_ION	-0.517255	-0.00675399	-9.63724	7.11642e-20	4.71497e-18	34.4234	Down
RECEPTOR_LOCALIZATION_TO_NON_MOTILE_CILIUM	-0.67671	-0.0382951	-9.63391	7.3056e-20	4.80967e-18	34.3977	Down
T_CELL_RECEPTOR_COMPLEX	-0.335663	-0.347425	-9.59825	9.67237e-20	6.17251e-18	34.1221	Down
CORECEPTOR_ACTIVITY	-0.272132	-0.117186	-9.56999	1.20757e-19	7.65923e-18	33.9043	Down
REGULATION_OF_SMOOTH_MUSCLE_CELL_DIFFERENTIATION	-0.258925	-0.0208417	-9.5467	1.44948e-19	9.02843e-18	33.725	Down
GLUTAMINE_METABOLIC_PROCESS	-0.431621	-0.106461	-9.52393	1.73235e-19	1.05999e-17	33.55	Down
POSITIVE_REGULATION_OF_NEURON_DIFFERENTIATION	-0.161237	-0.0116474	-9.48275	2.38982e-19	1.44529e-17	33.2342	Down
BRANCHIOMOTOR_NEURON_AXON_GUIDANCE	-0.539896	-0.0508876	-9.48026	2.43671e-19	1.45671e-17	33.2151	Down
SOMATIC_STEM_CELL_POPULATION_MAINTENANCE	-0.219872	-0.175396	-9.46586	2.72612e-19	1.6021e-17	33.105	Down
CELL_PROLIFERATION_IN_BONE_MARROW	-0.348549	2.60485e-05	-9.43709	3.41087e-19	1.98212e-17	32.885	Down
REGULATION_OF_STEM_CELL_POPULATION_MAINTENANCE	-0.261236	-0.25949	-9.43426	3.48671e-19	2.01493e-17	32.8635	Down
DE_NOVO_PYRIMIDINE_NUCLEOBASE_BIOSYNTHETIC_PROCESS	-0.620512	-0.0465121	-9.42657	3.70154e-19	2.12726e-17	32.8048	Down
HMG_BOX_DOMAIN_BINDING	-0.316248	-0.090839	-9.41709	3.98478e-19	2.27746e-17	32.7324	Down
PLASMA_MEMBRANE_SIGNALING_RECEPTOR_COMPLEX	-0.225081	-0.229184	-9.41144	4.16346e-19	2.36657e-17	32.6894	Down
NEGATIVE_T_CELL_SELECTION	-0.45134	-0.166678	-9.40311	4.44166e-19	2.49742e-17	32.6259	Down
SECONDARY_PALATE_DEVELOPMENT	-0.258951	-0.206148	-9.38057	5.2902e-19	2.91157e-17	32.4543	Down
SENSORY_ORGAN_DEVELOPMENT	-0.105455	-0.103702	-9.36813	5.82562e-19	3.15615e-17	32.3597	Down
NEUROMUSCULAR_JUNCTION_DEVELOPMENT	-0.296869	-0.0623491	-9.36525	5.95697e-19	3.21059e-17	32.3378	Down
DETECTION_OF_MECHANICAL_STIMULUS	-0.194085	-0.172437	-9.34618	6.90424e-19	3.70195e-17	32.193	Down
CAMERA_TYPE_EYE_PHOTORECEPTOR_CELL_DIFFERENTIATION	-0.231049	-0.0278524	-9.32308	8.25369e-19	4.40281e-17	32.0178	Down
HINDLIMB_MORPHOGENESIS	-0.22748	-0.0831667	-9.31782	8.59591e-19	4.56197e-17	31.9779	Down
REGULATION_OF_STEM_CELL_DIVISION	-0.370371	-0.0284722	-9.31438	8.82733e-19	4.66101e-17	31.9519	Down
RECEPTOR_COMPLEX	-0.167153	-0.162923	-9.2998	9.87803e-19	5.18946e-17	31.8415	Down
VESTIBULOCOCHLEAR_NERVE_FORMATION	-0.670758	-0.0277763	-9.27992	1.15134e-18	5.98811e-17	31.6912	Down
NEGATIVE_REGULATION_OF_LIPOPROTEIN_PARTICLE_CLEARANCE	0.351467	-0.067531	9.28597	1.09891e-18	5.74417e-17	31.7369	Up
NEUTROPHIL_EXTRAVASATION	0.493547	-0.0890675	9.36888	5.79204e-19	3.15439e-17	32.3654	Up
RESPONSE_TO_PEPTIDOGLYCAN	0.500321	-0.0194546	9.3732	5.60102e-19	3.06641e-17	32.3983	Up
PLASMA_CELL_DIFFERENTIATION	0.489924	-0.0491094	9.38158	5.249e-19	2.90426e-17	32.462	Up
PROTEASE_INHIBITOR_COMPLEX	0.466031	0.0576936	9.39389	4.77093e-19	2.65386e-17	32.5557	Up
PROTEIN_REPAIR	0.547751	-0.155761	9.40015	4.54491e-19	2.54173e-17	32.6033	Up
REGULATION_OF_FATTY_ACID_BIOSYNTHETIC_PROCESS	0.254447	0.00932464	9.40405	4.40946e-19	2.49278e-17	32.633	Up
GRANULOCYTE_MIGRATION	0.281772	-0.0917759	9.45605	2.94282e-19	1.71973e-17	33.0299	Up
PYROPTOSIS	0.31015	-0.219002	9.46827	2.67557e-19	1.58132e-17	33.1233	Up
HIGH_DENSITY_LIPOPROTEIN_PARTICLE_BINDING	0.370619	-0.0879133	9.47833	2.47352e-19	1.47026e-17	33.2004	Up
MONOCARBOXYLIC_ACID_TRANSPORT	0.160913	-0.120144	9.48111	2.42055e-19	1.45541e-17	33.2217	Up
CELLULAR_RESPONSE_TO_TOXIC_SUBSTANCE	0.182363	-0.165173	9.51094	1.91758e-19	1.16647e-17	33.4503	Up
CARBOHYDRATE_PHOSPHATASE_ACTIVITY	0.43596	-0.0806851	9.52559	1.70996e-19	1.05248e-17	33.5628	Up
PHOSPHOLIPASE_A2_INHIBITOR_ACTIVITY	0.612043	-0.0380991	9.53264	1.61818e-19	1.00192e-17	33.6169	Up
INTERLEUKIN_1_PRODUCTION	0.189808	-0.305734	9.55179	1.39273e-19	8.72724e-18	33.7642	Up
FATTY_ACID_TRANSPORT	0.173385	-0.0747935	9.56361	1.2695e-19	8.00321e-18	33.8552	Up
IGG_BINDING	0.730292	0.0133573	9.60247	9.35675e-20	6.00796e-18	34.1547	Up
REGULATION_OF_LIPID_TRANSPORTER_ACTIVITY	0.602723	0.0182107	9.60258	9.34823e-20	6.00796e-18	34.1556	Up
OXIDOREDUCTASE_ACTIVITY_ACTING_ON_A_SULFUR_GROUP_OF_DONORS_DISULFIDE_AS_ACCEPTOR	0.58179	-0.126138	9.60534	9.14738e-20	5.94694e-18	34.1769	Up
PLASMINOGEN_ACTIVATION	0.335124	-0.0673154	9.61811	8.2732e-20	5.41244e-18	34.2755	Up
SERINE_TYPE_ENDOPEPTIDASE_INHIBITOR_ACTIVITY	0.232104	-0.0590886	9.67156	5.42864e-20	3.61979e-18	34.6892	Up
CELLULAR_RESPONSE_TO_CADMIUM_ION	0.296215	-0.144759	9.68842	4.75155e-20	3.18875e-18	34.82	Up
ACTIN_MYOSIN_FILAMENT_SLIDING	0.382171	0.0343777	9.69523	4.50256e-20	3.08129e-18	34.8729	Up
NEGATIVE_REGULATION_OF_CHEMOKINE_C_C_MOTIF_LIGAND_5_PRODUCTION	0.6151	-0.0479319	9.70786	4.07448e-20	2.81652e-18	34.971	Up
NEGATIVE_REGULATION_OF_MEGAKARYOCYTE_DIFFERENTIATION	0.412731	-0.180934	9.72064	3.6826e-20	2.5709e-18	35.0703	Up
ICOSANOID_BIOSYNTHETIC_PROCESS	0.256087	-0.0992876	9.74847	2.95359e-20	2.09001e-18	35.2869	Up
TOLL_LIKE_RECEPTOR_4_BINDING	0.730289	-0.00797566	9.75242	2.86232e-20	2.0393e-18	35.3177	Up
CELLULAR_RESPONSE_TO_UV_A	0.417761	-0.110506	9.7695	2.49946e-20	1.79306e-18	35.4508	Up
CELLULAR_OXIDANT_DETOXIFICATION	0.210268	-0.146887	9.77409	2.40989e-20	1.74081e-18	35.4867	Up
POSITIVE_REGULATION_OF_PLASMINOGEN_ACTIVATION	0.623534	-0.032675	9.79643	2.0177e-20	1.4677e-18	35.6611	Up
SEQUESTERING_OF_IRON_ION	0.777632	-0.0266693	9.8051	1.88324e-20	1.37954e-18	35.7288	Up
NEUTROPHIL_MIGRATION	0.296589	-0.105031	9.81307	1.76745e-20	1.3039e-18	35.7912	Up
CALCIUM_MEDIATED_SIGNALING_USING_INTRACELLULAR_CALCIUM_SOURCE	0.308922	-0.203428	9.82227	1.64257e-20	1.22043e-18	35.8631	Up
RESPONSE_TO_ZINC_ION	0.250922	-0.0153031	9.82271	1.63682e-20	1.22043e-18	35.8666	Up
PYRIMIDINE_NUCLEOSIDE_CATABOLIC_PROCESS	0.407827	-0.0976733	9.83623	1.46957e-20	1.10772e-18	35.9724	Up
REGULATION_OF_LEUKOCYTE_TETHERING_OR_ROLLING	0.337323	-0.0886399	9.84028	1.42279e-20	1.08028e-18	36.0042	Up
NEGATIVE_REGULATION_OF_TUMOR_NECROSIS_FACTOR_SUPERFAMILY_CYTOKINE_PRODUCTION	0.192244	-0.289165	9.84629	1.35623e-20	1.045e-18	36.0512	Up
DNA_REPLICATION_DEPENDENT_CHROMATIN_ORGANIZATION	0.327564	-0.26691	9.85172	1.29865e-20	1.01568e-18	36.0939	Up
AZUROPHIL_GRANULE_LUMEN	0.381675	-0.167635	9.86248	1.19173e-20	9.46284e-19	36.1783	Up
PYRIMIDINE_NUCLEOSIDE_METABOLIC_PROCESS	0.425453	-0.0734886	9.90583	8.42627e-21	6.74231e-19	36.5187	Up
ANTIBACTERIAL_HUMORAL_RESPONSE	0.225988	-0.353372	9.91052	8.11521e-21	6.54375e-19	36.5557	Up
PYRIMIDINE_DEOXYRIBONUCLEOSIDE_MONOPHOSPHATE_METABOLIC_PROCESS	0.415076	-0.110072	9.91627	7.74965e-21	6.2978e-19	36.6009	Up
TETRAPYRROLE_CATABOLIC_PROCESS	0.337554	-0.171127	9.91665	7.7261e-21	6.2978e-19	36.6039	Up
RESPONSE_TO_COPPER_ION	0.260398	-0.145906	9.94591	6.11031e-21	5.0444e-19	36.8344	Up
DEFENSE_RESPONSE_TO_GRAM_POSITIVE_BACTERIUM	0.185707	-0.350349	9.96217	5.36238e-21	4.49835e-19	36.9627	Up
SPECIFIC_GRANULE	0.356645	-0.268124	10.0637	2.36526e-21	2.03334e-19	37.7668	Up
REGULATION_OF_NEUTROPHIL_EXTRAVASATION	0.540639	-0.0287844	10.0684	2.27828e-21	1.97489e-19	37.8036	Up
LEUKOTRIENE_BIOSYNTHETIC_PROCESS	0.460458	-0.108232	10.0825	2.03212e-21	1.80667e-19	37.9159	Up
TERTIARY_GRANULE	0.363956	-0.251152	10.1132	1.58488e-21	1.43356e-19	38.1601	Up
GLUTATHIONE_METABOLIC_PROCESS	0.276073	-0.150792	10.1185	1.51852e-21	1.38558e-19	38.2022	Up
NEGATIVE_REGULATION_OF_RESPONSE_TO_OXIDATIVE_STRESS	0.2937	-0.0892336	10.1392	1.28435e-21	1.18228e-19	38.3667	Up
DCMP_CATABOLIC_PROCESS	0.596198	-0.0379526	10.1806	9.16819e-22	8.66978e-20	38.698	Up
POSITIVE_REGULATION_OF_INCLUSION_BODY_ASSEMBLY	0.495189	-0.186038	10.2259	6.34024e-22	6.05056e-20	39.0604	Up
SODIUM_INDEPENDENT_ORGANIC_ANION_TRANSPORT	0.462855	0.0501666	10.2314	6.06149e-22	5.83812e-20	39.1046	Up
FEMALE_GENITALIA_DEVELOPMENT	0.334865	-0.113654	10.2544	5.02592e-22	4.97902e-20	39.2887	Up
MACROPHAGE_ACTIVATION_INVOLVED_IN_IMMUNE_RESPONSE	0.508157	-0.0822509	10.2544	5.02406e-22	4.97902e-20	39.289	Up
ANTIOXIDANT_ACTIVITY	0.244136	-0.144388	10.2609	4.76636e-22	4.81356e-20	39.3408	Up
SYNAPTIC_TRANSMISSION_DOPAMINERGIC	0.234065	-0.279052	10.2898	3.76215e-22	3.87465e-20	39.5733	Up
SEQUESTERING_OF_METAL_ION	0.492574	-0.0160016	10.2998	3.46576e-22	3.60509e-20	39.654	Up
COLLAGEN_CATABOLIC_PROCESS	0.297016	-0.176367	10.3263	2.7904e-22	2.93189e-20	39.867	Up
MONOCARBOXYLIC_ACID_BINDING	0.249312	-0.0465196	10.36	2.1162e-22	2.24619e-20	40.1388	Up
LONG_CHAIN_FATTY_ACID_BINDING	0.577771	-0.0137283	10.3659	2.01559e-22	2.16146e-20	40.1867	Up
VESICLE_LUMEN	0.344043	-0.160746	10.4097	1.40623e-22	1.53974e-20	40.5405	Up
NUCLEOSIDE_MONOPHOSPHATE_CATABOLIC_PROCESS	0.34448	-0.0253503	10.4315	1.17524e-22	1.30052e-20	40.7169	Up
POSITIVE_REGULATION_OF_DOPAMINE_SECRETION	0.498535	0.0121403	10.479	7.93456e-23	9.06981e-21	41.103	Up
STRESS_RESPONSE_TO_METAL_ION	0.44633	-0.0113611	10.4922	7.11658e-23	8.22518e-21	41.21	Up
POSITIVE_REGULATION_OF_DEFENSE_RESPONSE_TO_BACTERIUM	0.551459	-0.0871875	10.4989	6.73043e-23	7.86629e-21	41.2648	Up
POSITIVE_REGULATION_OF_MACROPHAGE_ACTIVATION	0.356489	-0.107446	10.5051	6.3976e-23	7.73812e-21	41.3147	Up
ARGININE_METABOLIC_PROCESS	0.299406	-0.262023	10.5885	3.20098e-23	4.11069e-21	41.9954	Up
CHROMOSOME_CENTROMERIC_CORE_DOMAIN	0.427332	-0.236506	10.6323	2.22455e-23	2.96664e-21	42.3532	Up
RESPONSE_TO_TOXIC_SUBSTANCE	0.148496	-0.146202	10.6846	1.43791e-23	1.96804e-21	42.7823	Up
SPECIFIC_GRANULE_LUMEN	0.412546	-0.267017	10.7158	1.10793e-23	1.53663e-21	43.0386	Up
KILLING_OF_CELLS_OF_ANOTHER_ORGANISM	0.29874	-0.177531	10.7441	8.7395e-24	1.25917e-21	43.2718	Up
DUMP_METABOLIC_PROCESS	0.49508	-0.042493	10.7592	7.70132e-24	1.1283e-21	43.3962	Up
PROTEIN_NITROSYLATION	0.41572	-0.00815072	10.7632	7.44303e-24	1.10603e-21	43.4297	Up
NEGATIVE_REGULATION_OF_PEPTIDASE_ACTIVITY	0.196015	-0.15473	10.7648	7.34657e-24	1.10603e-21	43.4426	Up
DEFENSE_RESPONSE_TO_GRAM_NEGATIVE_BACTERIUM	0.283079	-0.176166	10.7763	6.66973e-24	1.02027e-21	43.5376	Up
MYOSIN_II_COMPLEX	0.362191	-0.0467106	10.8089	5.07358e-24	7.87693e-22	43.8066	Up
DETOXIFICATION	0.204941	-0.114969	10.8835	2.70675e-24	4.39932e-22	44.4245	Up
LIPASE_INHIBITOR_ACTIVITY	0.430912	-0.0323105	10.9216	1.96222e-24	3.23984e-22	44.7408	Up
RECEPTOR_MEDIATED_VIRION_ATTACHMENT_TO_HOST_CELL	0.570405	0.0269664	10.934	1.76763e-24	2.96562e-22	44.8435	Up
MONOCYTE_ACTIVATION	0.30179	-0.319325	10.9494	1.55083e-24	2.68862e-22	44.9722	Up
PHOSPHOLIPASE_INHIBITOR_ACTIVITY	0.469607	-0.0345307	11.0093	9.34e-25	1.7349e-22	45.471	Up
UMP_CATABOLIC_PROCESS	0.678033	-0.034234	11.0522	6.48879e-25	1.22721e-22	45.8292	Up
AUTOCRINE_SIGNALING	0.504961	0.00965302	11.0532	6.43434e-25	1.22721e-22	45.8375	Up
PYRIMIDINE_NUCLEOSIDE_MONOPHOSPHATE_CATABOLIC_PROCESS	0.649433	-0.0205853	11.0901	4.6972e-25	9.21891e-23	46.147	Up
NEGATIVE_REGULATION_OF_CATION_CHANNEL_ACTIVITY	0.239036	-0.0694718	11.0987	4.36784e-25	8.90868e-23	46.2185	Up
NEGATIVE_REGULATION_OF_INTERLEUKIN_1_PRODUCTION	0.26911	-0.244129	11.1055	4.12028e-25	8.57183e-23	46.2759	Up
LIPOPOLYSACCHARIDE_BINDING	0.412823	-0.0143186	11.2136	1.63625e-25	3.62134e-23	47.1844	Up
RESPONSE_TO_SELENIUM_ION	0.46364	0.0197767	11.2774	9.47115e-26	2.18931e-23	47.7223	Up
ICOSANOID_BINDING	0.875482	0.0190464	11.2858	8.80737e-26	2.08214e-23	47.7938	Up
HYDROLASE_ACTIVITY_ACTING_ON_CARBON_NITROGEN_BUT_NOT_PEPTIDE_BONDS_IN_LINEAR_AMIDINES	0.245127	-0.511089	11.3107	7.10816e-26	1.71951e-23	48.0046	Up
NEGATIVE_REGULATION_OF_NITRIC_OXIDE_METABOLIC_PROCESS	0.416176	-0.0098792	11.3157	6.81203e-26	1.68711e-23	48.0465	Up
RENAL_PROTEIN_ABSORPTION	0.689556	0.0111873	11.3256	6.25414e-26	1.62639e-23	48.1306	Up
PEPTIDASE_INHIBITOR_COMPLEX	0.513158	-0.0517839	11.3287	6.09153e-26	1.62472e-23	48.1565	Up
RAGE_RECEPTOR_BINDING	0.720562	-0.0125635	11.3816	3.86157e-26	1.08562e-23	48.605	Up
RESPIRATORY_BURST_INVOLVED_IN_DEFENSE_RESPONSE	0.519572	-0.0252751	11.3841	3.77868e-26	1.08562e-23	48.6263	Up
NEGATIVE_REGULATION_OF_RESPONSE_TO_REACTIVE_OXYGEN_SPECIES	0.339637	-0.100555	11.4349	2.43588e-26	7.23943e-24	49.0583	Up
MONOCARBOXYLIC_ACID_TRANSMEMBRANE_TRANSPORTER_ACTIVITY	0.247558	-0.0583346	11.4506	2.12765e-26	6.70258e-24	49.1914	Up
MEMBRANE_FUSION_INVOLVED_IN_VIRAL_ENTRY_INTO_HOST_CELL	0.814045	-0.00030679	11.4554	2.04106e-26	6.63472e-24	49.2323	Up
RESPONSE_TO_PROTOZOAN	0.45341	-0.121907	11.4624	1.91987e-26	6.44208e-24	49.2926	Up
KILLING_BY_HOST_OF_SYMBIONT_CELLS	0.435459	-0.164347	11.4676	1.83527e-26	6.36349e-24	49.3369	Up
TERTIARY_GRANULE_LUMEN	0.489834	-0.197556	11.4911	1.49745e-26	5.56303e-24	49.5371	Up
INNATE_IMMUNE_RESPONSE_IN_MUCOSA	0.423259	-0.244283	11.4962	1.43312e-26	5.52124e-24	49.5803	Up
DNA_PACKAGING_COMPLEX	0.341278	-0.156697	11.593	6.1773e-27	2.57025e-24	50.4084	Up
DUMP_CATABOLIC_PROCESS	0.678285	-0.0268084	11.6123	5.22318e-27	2.36224e-24	50.5735	Up
PEPTIDASE_REGULATOR_ACTIVITY	0.207894	-0.154177	11.6731	3.07233e-27	1.45266e-24	51.0957	Up
ZYMOGEN_ACTIVATION	0.393285	-0.0779249	11.6904	2.64217e-27	1.30875e-24	51.2442	Up
ANTIMICROBIAL_HUMORAL_RESPONSE	0.26789	-0.245957	11.7807	1.19859e-27	7.33395e-25	52.0221	Up
DEOXYRIBONUCLEOSIDE_MONOPHOSPHATE_CATABOLIC_PROCESS	0.476324	-0.0153933	11.827	7.98157e-28	5.53495e-25	52.4223	Up
ORGAN_OR_TISSUE_SPECIFIC_IMMUNE_RESPONSE	0.372785	-0.174284	11.9068	3.95297e-28	3.16298e-25	53.1139	Up
NEGATIVE_REGULATION_OF_RESPONSE_TO_INTERFERON_GAMMA	0.729047	-0.0333962	12.0475	1.14075e-28	9.88838e-26	54.3372	Up
RESPONSE_TO_FUNGUS	0.388355	-0.146721	12.0704	9.30877e-29	8.80271e-26	54.5373	Up
ENDOPEPTIDASE_REGULATOR_ACTIVITY	0.219266	-0.165648	12.2023	2.88058e-29	2.99638e-26	55.692	Up
DEFENSE_RESPONSE_TO_FUNGUS	0.391841	-0.171138	12.2193	2.47725e-29	2.86315e-26	55.8405	Up
FATTY_ACID_BINDING	0.349431	-0.0387363	12.4417	3.38326e-30	5.02752e-27	57.8005	Up
ANTIMICROBIAL_HUMORAL_IMMUNE_RESPONSE_MEDIATED_BY_ANTIMICROBIAL_PEPTIDE	0.378231	-0.143914	13.0756	1.07078e-32	3.71276e-29	63.468	Up
CYSTEINE_TYPE_ENDOPEPTIDASE_INHIBITOR_ACTIVITY	0.31461	-0.066118	13.465	2.95561e-34	1.53721e-30	67.0035	Up
